# Supplementary material
Source: publisher figshare collection journal article supplement (https://gsapubs.figshare.com/articles/dataset/_/12529838)
Supplement: Supplementary file 1 [file 1]

## Supporting Online Material

| Pacific          |                    |          |           |           |                      |                                               |                                                     |          |                        |                       |
|------------------|--------------------|----------|-----------|-----------|----------------------|-----------------------------------------------|-----------------------------------------------------|----------|------------------------|-----------------------|
| Location         | Site               | LAT      | LON       | Reef Type | Vert. Motion (mm/yr) | Vert. Motion References                       | Method                                              | Max Age  | Accretion Rate (mm/yr) | Coral Growth Citation |
| Papua New Guinea | Gagar Anunui       | -6.0065  | 147.4827  | UTs       | 0.94                 | Bloom et al., 1974                            | U-Series (Uplifted Corals)                          | > MIS 7  | 7                      | Montaggioni, 2005     |
|                  | Sialum             | -6.0983  | 147.6058  | UTs       | 1.65                 | Bloom et al., 1974                            | U-Series (Uplifted Corals)                          | > MIS 7  | 7                      | Montaggioni, 2005     |
|                  | Kanzaura           | -6.2157  | 147.6892  | UTs       | 2.56                 | Bloom et al., 1974                            | U-Series (Uplifted Corals)                          | > MIS 7  | 7                      | Montaggioni, 2005     |
|                  | Huon Gulf          | -7.2563  | 147.4132  | DPs       | -4                   | Webster et al., 2004                          | U-Series (Drowned Corals)                           | MIS 9    | 7                      | Montaggioni, 2005     |
| Vanuatu          | Espiritu Santo     | -15.8089 | 166.8907  | UTs       | 4.7                  | Cabioch, 2003                                 | <sup>14</sup> C (Uplifted Corals)                   | Holocene | 2.5                    | Montaggioni, 2005     |
|                  | Malekula           | -15.9524 | 167.2916  | UTs       | 3.5                  | Taylor et al., 1980                           | <sup>14</sup> C (Uplifted Corals)                   | Holocene | [2.5]                  | Montaggioni, 2005     |
| New Caledonia    | Poum               | -20.2541 | 164.0056  | BR        | -0.08                | Cabioch, 2003                                 | U-Series/ <sup>14</sup> C                           | Holocene | 5.5                    | Cabioch et al., 1995  |
|                  | Pouebo             | -20.3716 | 164.5916  | BR        | -0.14                | Cabioch, 2003                                 | U-Series/ <sup>14</sup> C                           | Holocene | 5.5                    | Cabioch et al., 1995  |
|                  | Poindimie          | -20.9404 | 165.4063  | BR        | -0.1                 | Cabioch, 2003                                 | U-Series/ <sup>14</sup> C                           | Holocene | 5.5                    | Cabioch et al., 1995  |
|                  | Ilot Tenia         | -22.0098 | 165.9383  | BR        | -0.11                | Cabioch, 2003                                 | U-Series/ <sup>14</sup> C                           | Holocene | 5.5                    | Cabioch et al., 1995  |
|                  | Ilot Amedee        | -22.4768 | 166.4690  | BR        | -0.14                | Cabioch, 2003                                 | U-Series/ <sup>14</sup> C                           | Holocene | 5.5                    | Cabioch et al., 1995  |
|                  | Yate               | -22.1625 | 166.9583  | FR        | 0.03                 | Cabioch, 2003                                 | U-Series/ <sup>14</sup> C                           | Holocene | 5.5                    | Cabioch et al., 1995  |
|                  | Ricaudy (Noumee)   | -22.3139 | 166.4556  | BR        | -0.07                | Cabioch, 2003                                 | U-Series/ <sup>14</sup> C                           | Holocene | 5.5                    | Cabioch et al., 1995  |
| Loyalty Islands  | Maré               | -21.4564 | 167.9824  | FR(e)     | 0.175                | Marshall and Launay, 1978                     | U-Series (Uplifted Corals)                          | MIS 5    | [5.5]                  |                       |
|                  | Lifou              | -20.8469 | 167.2740  | FR(e)     | 0.145                | Marshall and Launay, 1978                     | U-Series (Uplifted Corals)                          | MIS 6    | [5.5]                  |                       |
| Cook Islands     | Mangaia            | -21.9045 | -157.9061 | FR(e)     | 0.085                | Woodroffe et al., 1991                        | U-Series (Uplifted Corals)                          | MIS 5    | 3.5                    | Montaggioni, 2005     |
|                  | Atiu               | -20.0147 | -158.0966 | FR(e)     | 0.05                 | Woodroffe et al., 1991                        | U-Series (Uplifted Corals)                          | MIS 5    | [3.5]                  | Montaggioni, 2005     |
|                  | Mitiaro            | -19.8717 | -157.8854 | FR(e)     | 0.03                 | Woodroffe et al., 1991                        | U-Series (Uplifted Corals)                          | MIS 5    | [3.5]                  | Montaggioni, 2005     |
|                  | Mauke              | -20.1458 | -157.3580 | FR(e)     | 0.04                 | Woodroffe et al., 1991                        | U-Series (Uplifted Corals)                          | MIS 5    | [3.5]                  | Montaggioni, 2005     |
| Society Islands  | Rarotonga          | -21.2352 | -159.8115 | FR        | -0.02                | Woodroffe et al., 1991                        |                                                     | MIS 5    | [3.5]                  | Montaggioni, 2005     |
|                  | Tahiti             | -17.5319 | -149.5800 | BR        | -0.25                | Bard et al., 1996                             | K-Ar (Drowned Subaerial Lava Flows)                 | Holocene | 6.5 (36)               | Montaggioni, 2005     |
|                  | Moorea             | -17.4888 | -149.8690 | BR        | -0.185               | Menard, 1983                                  | Inferred Coral Thickness/Island Age                 | 1.55 Ma  | 5 (>10)                | Montaggioni, 2005     |
|                  | Raiatea            | -16.7692 | -151.4078 | BR        | -0.13                | Menard, 1983                                  | Inferred Coral Thickness/Island Age                 | 2.5 Ma   | [5.75]                 | Montaggioni, 2005     |
|                  | Bora Bora          | -16.4916 | -151.7113 | BR        | -0.09                | Menard, 1983                                  | Inferred Coral Thickness/Island Age                 | 3.25 Ma  | [5.75]                 | Montaggioni, 2005     |
|                  | Big Island         | 19.9636  | -156.0134 | DTs       | -2.6                 | Ludwig et al., 1991                           | U-Series (Drowned Corals)                           | MIS 12   | 2.675                  | Webster et al., 2007  |
|                  | Oahu               | 21.6870  | -158.0473 | FR(e)     | 0.06                 | McMurtry et al., 2009                         | U-Series (Uplifted Corals)                          | MIS 9    | 1.58                   | Montaggioni, 2005     |
| Hawaiian Islands | Molokai/Lanai/Maui | 20.6916  | -156.7637 | DBR/DTs   | -0.58                | Webster et al., 2010<br>Faichney et al., 2009 | <sup>87</sup> Sr/ <sup>86</sup> Sr (Drowned Corals) | <500 ka  | 5.75                   | Montaggioni, 2005     |
|                  | Ryukus             |          |           |           |                      |                                               |                                                     |          |                        |                       |
|                  | Kikai              | 28.2998  | 129.9714  | UTs       | 1.8                  | Ota and Omura, 1992                           | U-Series (Uplifted Corals)                          | MIS 5    | [4.9]                  | Montaggioni, 2005     |
|                  | Hateruma           | 24.0576  | 123.7905  | FR(e)     | 0.3                  | Ota and Omura, 1992                           | U-Series (Uplifted Corals)                          | MIS 6    | [4.9]                  | Montaggioni, 2005     |
| Yonaguni         | Yonaguni           | 24.4467  | 122.9715  | FR(e)     | 0.2                  | Ota and Omura, 1992                           | U-Series (Uplifted Corals)                          |          | [4.9]                  | Montaggioni, 2005     |
|                  | Kita-Daito         | 25.9486  | 131.3018  | FR(e)     | 0.3                  | Ota and Omura, 1992                           | U-Series (Uplifted Corals)                          | MIS 5    | [4.9]                  | Montaggioni, 2005     |
|                  | Minami-Daito       | 25.8265  | 131.2242  | FR(e)     | 0.05                 | Ota and Omura, 1992                           | U-Series (Uplifted Corals)                          | MIS 5    | [4.9]                  | Montaggioni, 2005     |
|                  |                    |          |           |           |                      |                                               |                                                     |          |                        |                       |
| Atlantic         |                    |          |           |           |                      |                                               |                                                     |          |                        |                       |
| Location         | Site               | LAT      | LON       | Reef Type | Vert. Motion (mm/yr) | Uplift References                             | Method                                              | Max Age  | Accretion Rate (mm/yr) | Coral Growth Citation |
| Barbados         | Cave Hill          | 13.1332  | -59.6316  | UTs       | 0.53                 | Speed and Cheng, 2004                         | U-Series (Uplifted Corals)                          | MIS 5    | 8.3                    | Hubbard, 2009         |
| Haiti            | Mole St. Nicolas   | 19.8210  | -73.3542  | UTs       | 0.35                 | Dodge et al., 1982                            | U-Series (Uplifted Corals)                          | MIS 5    | 6.1*                   | Dullo, 2005           |
| Puerto Rico      | Isla de Mona       | 18.1100  | -67.9014  | FR(e)     | 0.045                | Hubbard et al., 2008                          |                                                     | MIS 5    | 3.77                   | Hubbard, 2009         |
| St. Croix        |                    | 17.7906  | -84.6195  | FR/DT     | 0.012                | Hubbard et al., 2008                          | U-Series (Uplifted Shell)                           | MIS 5    | 2.9                    | Hubbard, 2009         |
| Indian           |                    |          |           |           |                      |                                               |                                                     |          |                        |                       |
| Location         | Site               | LAT      | LON       | Reef Type | Vert. Motion (mm/yr) | Uplift References                             | Method                                              | Max Age  | Accretion Rate (mm/yr) | Coral Growth Citation |
| Mauritius        | Pointe-aux-Sables  | -20.1635 | 57.4557   | FR        | -0.04                | Camion et al., 1997                           |                                                     | MIS 5    | 3                      | Montaggioni, 2005     |
| Mayotte          | Pamandzi Islet     | -12.8280 | 45.2841   | BR        | -0.2                 | Camion et al., 1997                           |                                                     | MIS: 5-7 | 4.5                    | Montaggioni, 2005     |
| Reunion          | La Saline          | -21.0919 | 55.2295   | FR        | -0.04                | Camion et al., 1997                           |                                                     |          | 3                      | Montaggioni, 2005     |
| East Timor       | Northern Coast     | -8.5170  | 126.0551  | UTs       | 0.5                  | Chappell and Veeh, 1978                       | U-Series (Uplifted Corals)                          | MIS 5    | 4.4*                   | Dullo, 2005           |
|                  | Dili               | -8.5350  | 125.7051  | FR(e)     | 0.03                 | Chappell and Veeh, 1978                       | U-Series (Uplifted Corals)                          | MIS 5    | 4.4*                   | Dullo, 2005           |
|                  | Atauro             | -8.3007  | 125.5573  | UTs       | 0.47                 | Chappell and Veeh, 1978                       | U-Series (Uplifted Corals)                          | MIS 5    | 4.4*                   | Dullo, 2005           |
| Sumba            | Cape Laundi        | -9.4978  | 120.1880  | UTs       | 0.35                 | Bard et al., 1996b                            | U-Series (Uplifted Corals)                          | MIS 8    | 4.4*                   | Dullo, 2005           |

**Table DR1.** Summary of available reef vertical motion and accretion data plotted in Figures 3 and S3. References summarizing data from multiple sites and sources are shown in bold. Mean uplift rate shown for ranges reported in the literature. Accretion rates represent an island-averaged rate based on the mean values observed across sites, as reviewed in the literature. In the case that reef accretion rates had not been measured, the mean value for the particular island chain (indicated with [ ]) or ocean basin (indicated with \*) was used. A few exceptions occur: For the Big Island of Hawaii, we used the growth rate that Webster et al. (2007) estimated based on their model results, which does not differ substantially from the average across the Hawaiian Islands. For Tahiti and Moorea, only the accretion rates reported for barrier reefs were used, as the observed rates from inland fringing reefs were substantially higher than all of the other sites. Such fast accretion rates are probably not representative of the geologic past. Indeed, accretion rates >25 mm/yr would outpace known drowning mechanisms, yet drowned reefs and atolls proliferate. Vertical Motion rates represent an average over the interval of study. Reef types are: Uplifted Terraces (UTs), Emergent Fringing Reef (FR(e)), Fringing Reef (FR), Barrier Reef (BR), Drowned Terraces (DTs), Drowned Barrier Reef (DBR).

## **Toomey et al. Data Repository Videos**

Six movies, one for each of the reef types identified in the manuscript, have been compiled to provide a representative sample of how each profile develops over a typical model run. For each of these runs, we used the proxy derived SL curve. Like the plots shown in Figure 1a-1d, an initial slope of 0.05 was used for the Hawaiian Islands and 0.15 for each of the other examples. All other parameters follow those shown in Table DR2.

Drowned Terraces (Hawaii): VideoDR1-VM=-2.6mm/yr, G=2.65mm/yr

Drowned Lagoons (Molokai): VideoDR2-VM=-0.58mm/yr, G=5.75mm/yr

Emergent Fringing (Oahu): VideoDR3-VM=0.06mm/yr. G=2.5mm/yr

Barrier Reef (Tahiti): VideoDR4-VM=-0.275mm/yr, G=6.5mm/yr

Uplifted Terraces (PNG): VideoDR5-VM=2.56mm/yr, G=7mm/yr

Fringing Reef (Reunion): VideoDR6-VM=-0.04mm/yr, G=3mm/yr
